# Supplementary material for: Nutritional and Exercise-Focused Lifestyle Interventions and Glycemic Control in Women with Diabetes in Pregnancy: A Systematic Review and Meta-Analysis of Randomized Clinical Trials
Source: MDPI journal article supplement (doi:10.3390/nu15020323), 2023-01-09
Supplement: s1 [file s1]

**Table S4.** GRADE Assessment for diet-based intervention

| Outcome                              | № of studies | № of participants        |                          | Certainty assessment |                      |                      |                           |                      | Effect estimate             | Grade            |
|--------------------------------------|--------------|--------------------------|--------------------------|----------------------|----------------------|----------------------|---------------------------|----------------------|-----------------------------|------------------|
|                                      |              | Diet-based interventions | Placebo or standard care | Risk of bias         | Inconsistency        | Indirectness         | Imprecision               | Other considerations |                             |                  |
| <i>Fasting glucose (mmol/L)</i>      | 10           | 309                      | 296                      | Serious <sup>a</sup> | Serious <sup>b</sup> | Not serious          | Not serious               | None                 | <b>-0.17</b> [-0.35 , 0.01] | ⊕⊕○○<br>Low      |
| <i>Postprandial glucose (mmol/L)</i> | 5            | 125                      | 133                      | Not serious          | Serious <sup>b</sup> | Not serious          | Very serious <sup>c</sup> | None                 | <b>-0.23</b> [-0.69 , 0.24] | ⊕○○○<br>Very low |
| <i>HbA1c (%)</i>                     | 4            | 167                      | 158                      | Not serious          | Serious <sup>b</sup> | Serious <sup>d</sup> | Serious <sup>c</sup>      | None                 | <b>-0.08</b> [-0.23 , 0.08] | ⊕○○○<br>Very low |
| <i>HOMA-IR</i>                       | 5            | 107                      | 107                      | Not serious          | Serious <sup>b</sup> | Not serious          | Not serious               | None                 | <b>-1.15</b> [-2.12 , 0.17] | ⊕⊕⊕○<br>Moderate |

a. Problems with allocation concealment and blinding of participants/researchers/outcome assessors.

b. Due to high unexplained heterogeneity.

c. The 95% CI included benefits and harms.

d. Due to substantial differences in interventions.
