# Supplementary material for: Nutritional and Exercise-Focused Lifestyle Interventions and Glycemic Control in Women with Diabetes in Pregnancy: A Systematic Review and Meta-Analysis of Randomized Clinical Trials
Source: MDPI journal article supplement (doi:10.3390/nu15020323), 2023-01-09
Supplement: s1 [file s1]

**Table S3. GRADE Assessment for nutritional supplement-based intervention**

| Outcome                              | № of studies | № of participants        |                          | Certainty assessment |                      |                      |                           |                                                  | Effect estimate              | Grade            |
|--------------------------------------|--------------|--------------------------|--------------------------|----------------------|----------------------|----------------------|---------------------------|--------------------------------------------------|------------------------------|------------------|
|                                      |              | Diet-based interventions | Placebo or standard care | Risk of bias         | Inconsistency        | Indirectness         | Imprecision               | Other considerations                             |                              |                  |
| <i>Fasting glucose (mmol/L)</i>      | 8            | 264                      | 268                      | Not serious          | Serious <sup>a</sup> | Serious <sup>b</sup> | Not serious               | None                                             | <b>-0.3</b> [-0.55 , -0.06]  | ⊕⊕○○<br>Low      |
| <i>Postprandial glucose (mmol/L)</i> | 1            | 37                       | 33                       | Not serious          | Not serious          | Not serious          | Very serious <sup>c</sup> | Publication bias strongly suspected <sup>d</sup> | <b>-0.1</b> [-0.66 , 0.46]   | ⊕○○○<br>Very low |
| <i>HbA1c (%)</i>                     | 1            | 30                       | 30                       | Not serious          | Not serious          | Not serious          | Not serious               | Publication bias strongly suspected <sup>d</sup> | <b>-0.15</b> [-0.22 , 0.08]  | ⊕⊕⊕○<br>Moderate |
| <i>HOMA-IR</i>                       | 6            | 204                      | 208                      | Not serious          | Not serious          | Serious <sup>b</sup> | Not serious               | None                                             | <b>-0.04</b> [-0.58 , -0.22] | ⊕⊕⊕○<br>Moderate |

a. Due to high unexplained heterogeneity.

b. Due to substantial differences in interventions and comparisons.

c. The 95% CI included benefits and harms.

d. Only reported by 1 study.
