# Supplementary material for: Nutritional and Exercise-Focused Lifestyle Interventions and Glycemic Control in Women with Diabetes in Pregnancy: A Systematic Review and Meta-Analysis of Randomized Clinical Trials
Source: MDPI journal article supplement (doi:10.3390/nu15020323), 2023-01-09
Supplement: s1 [file s1]

**Table S1.** Predetermined search strategy

| SEARCH CATEGORIES  | USED SEARCH TERMS                                                                                                                                                  |
|--------------------|--------------------------------------------------------------------------------------------------------------------------------------------------------------------|
| 1. POPULATION      | (diabet*) OR (GDM) OR (IDDM) OR (NIDDM) OR (MODY) OR (LADA)                                                                                                        |
| 2. INTERVENTION    | (exercise) OR (sports) OR (activity) OR (fitness) OR (training) OR (accelerom*) OR (pedomet*) OR (steps) OR (weightlifting)                                        |
| 3. OUTCOME         | (insulin) OR (glucose) OR (glycaemic*) OR (glycemic*) OR (blood sugar) OR (glycated haemoglobin) OR (glycated haemoglobin) OR (HbA1c) OR (OGTT) OR (AUC) OR (HOMA) |
| 4. STUDY TYPE      | (randomized controlled trial) OR (random*) OR (placebo*) OR (single blind*) OR (double blind*) OR (triple blind*) OR (clinical trial) AND (humans NOT animals)     |
| 5. COMBINED SEARCH | (1) AND (2) AND (3) AND (4)                                                                                                                                        |
