# Supplementary material for: Nutritional and Exercise-Focused Lifestyle Interventions and Glycemic Control in Women with Diabetes in Pregnancy: A Systematic Review and Meta-Analysis of Randomized Clinical Trials
Source: MDPI journal article supplement (doi:10.3390/nu15020323), 2023-01-09
Supplement: s1 [file s1]

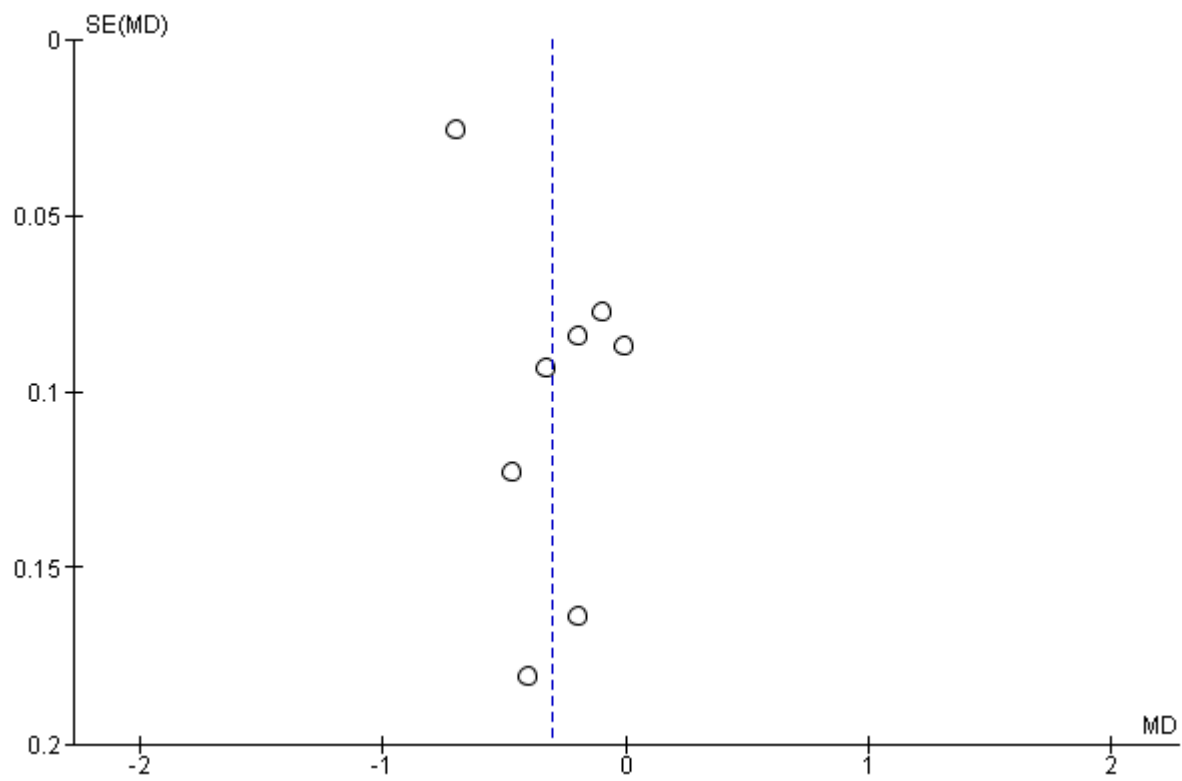

**Figure S1.** Funnel plot of fasting plasma glucose (mmol/L) in nutritional supplement interventions
