# Supplementary material for: Nutritional and Exercise-Focused Lifestyle Interventions and Glycemic Control in Women with Diabetes in Pregnancy: A Systematic Review and Meta-Analysis of Randomized Clinical Trials
Source: MDPI journal article supplement (doi:10.3390/nu15020323), 2023-01-09
Supplement: s1 [file s1]

Table S2. Risk of bias assessment

| Study ID                | Experimental                         | Comparator                          | Outcome        | Weight | D1 | D2 | D3 | D4 | D5 | Overall |    |
|-------------------------|--------------------------------------|-------------------------------------|----------------|--------|----|----|----|----|----|---------|----|
| Asemi (2013)            | DASH diet                            | Standard care diet                  | FG, PPG, HbA1c | NA     | +  | +  | +  | +  | +  | +       | +  |
| Aslalah (2020)          | ALA supplement                       | Cellulose acetate                   | FG, HbA1c      | NA     | +  | +  | +  | +  | +  | +       | +  |
| Bo (2014)               | Brisk walks 20 min/day               | Standard care diet                  | FG, PPG, HbA1c | NA     | +  | +  | +  | +  | +  | +       | +  |
| Brankston (2004)        | Resistance exercise                  | Standard care diet                  | FG, PPG        | NA     | +  | +  | +  | !  | +  | !       |    |
| de Barros (2010)        | Resistance exercise                  | Standard antenatal care             | FG             | NA     | +  | +  | +  | !  | +  | !       | D1 |
| Fei (2014)              | SBOS supplement                      | Standard antenatal care             | FG, HOMA-IR    | NA     | +  | !  | +  | !  | +  | !       | D2 |
| Grant (2011)            | Low GI diet                          | Standard care diet                  | FG, PPG        | NA     | +  | +  | +  | !  | +  | !       | D3 |
| Hajimoosayi (2020)      | Ginger supplement                    | Placebo supplement                  | FG, PPG, HOMA  | NA     | +  | +  | +  | !  | +  | !       | D4 |
| Halse (2014)            | Home-based exercises                 | Standard antenatal care             | FG, PPG, HbA1c | NA     | +  | +  | +  | !  | +  | !       | D5 |
| Hernandez (2014)        | Higher complex CHO                   | Standard care diet                  | FG, PPG        | NA     | +  | +  | +  | !  | +  | !       |    |
| Hernandez (2016)        | Higher complex CHO                   | Standard care diet                  | HOMA-IR        | NA     | +  | +  | +  | !  | +  | !       |    |
| Jamilian (2015)         | Soy diet                             | Control diet                        | FG, HOMA-IR    | NA     | +  | +  | +  | +  | +  | +       |    |
| Jamilian (2018)         | Fish oil supplement                  | Placebo supplement                  | FG, HOMA-IR    | NA     | +  | +  | +  | +  | +  | +       |    |
| Jamilian (2019)         | Mg-zinc-calcium-Vit D                | Placebo supplement                  | FG             | NA     | +  | +  | +  | +  | +  | +       |    |
| Jamilian (2020)         | Flaxseed oil/ ALA supplement         | Placebo supplement                  | FG, HOMA-IR    | NA     | +  | +  | +  | +  | +  | +       |    |
| Kokic (2018)            | Exercise programme / walks           | Standard antenatal care             | FG, PPG        | NA     | +  | +  | +  | +  | +  | +       |    |
| Lindsay (2015)          | Probiotic (Lactobacillus salivarius) | Placebo supplement                  | FG, HOMA       | NA     | +  | +  | +  | +  | +  | +       |    |
| Louie (2011)            | Low glycemic index (target GI<50)    | Standard care diet                  | HOMA, HbA1c    | NA     | +  | +  | +  | +  | +  | +       |    |
| Ma (2015)               | Intensive low glycemic load          | Standard care diet                  | FG, PPG, HbA1c | NA     | +  | +  | +  | !  | +  | !       |    |
| Ostadmohammadi (2019)   | Zinc Gluconate / Vit E supplement    | Placebo supplement                  | FG, HOMA       | NA     | +  | +  | +  | +  | +  | +       |    |
| Perichart-Perera (2012) | Low glycemic index                   | Standard care diet                  | FG             | NA     | +  | +  | +  | !  | +  | !       |    |
| Qazi (2020)             | Moderate intensity aerobics          | Standard antenatal care             | HbA1c          | NA     | +  | +  | +  | !  | +  | !       |    |
| Rae (2000)              | Moderately energy restricted diet    | Standard care diet (not restricted) | FG, HbA1c      | NA     | +  | +  | +  | +  | +  | +       |    |
| Rasmussen (2020)        | Low CHO morning intake               | High CHO morning intake             | FG, HOMA       | NA     | +  | +  | +  | !  | +  | !       |    |
| Valentini (2012)        | "Ethnic meal plan"                   | Standard care diet                  | FG, PPG, HbA1c | NA     | !  | +  | +  | !  | -  | -       |    |
| Wang (2015)             | Oil-rich diet                        | Standard care diet                  | FG, PPG        | NA     | !  | +  | +  | !  | +  | !       |    |
| Yao (2015)              | DASH diet                            | Standard care diet                  | FG, HOMA       | NA     | !  | +  | +  | !  | +  | !       |    |

-  Low risk  
 Some concerns  
 High risk
- D1 Randomisation process  
 D2 Deviations from interventions  
 D3 Missing outcome data  
 D4 Measurement of the outcome  
 D5 Selection of the reported result
