# Supplementary material for: Nutritional and Exercise-Focused Lifestyle Interventions and Glycemic Control in Women with Diabetes in Pregnancy: A Systematic Review and Meta-Analysis of Randomized Clinical Trials
Source: MDPI journal article supplement (doi:10.3390/nu15020323), 2023-01-09
Supplement: s1 [file s1]

**Table S5.** GRADE Assessment for exercise-based intervention

| Outcome                              | № of studies | № of participants        |                          | Certainty assessment |                      |                      |                      |                                                  | Effect estimate             | Grade            |
|--------------------------------------|--------------|--------------------------|--------------------------|----------------------|----------------------|----------------------|----------------------|--------------------------------------------------|-----------------------------|------------------|
|                                      |              | Diet-based interventions | Placebo or standard care | Risk of bias         | Inconsistency        | Indirectness         | Imprecision          | Other considerations                             |                             |                  |
| <i>Fasting glucose (mmol/L)</i>      | 5            | 181                      | 185                      | Not serious          | Not serious          | Serious <sup>a</sup> | Not serious          | None                                             | <b>-0.1</b> [-0.20 , -0.01] | ⊕⊕⊕○<br>Moderate |
| <i>Postprandial glucose (mmol/L)</i> | 4            | 149                      | 153                      | Not serious          | Serious <sup>b</sup> | Serious <sup>a</sup> | Serious <sup>c</sup> | None                                             | <b>-0.24</b> [-0.59 , 0.11] | ⊕○○○<br>Very low |
| <i>HbA1c (%)</i>                     | 3            | 144                      | 146                      | Not serious          | Serious <sup>b</sup> | Serious <sup>a</sup> | Serious <sup>c</sup> | None                                             | <b>0.04</b> [-0.19 , 0.27]  | ⊕○○○<br>Very low |
| <i>HOMA-IR</i>                       | 1            | 99                       | 101                      | Not serious          | Not serious          | Not serious          | Serious <sup>c</sup> | Publication bias strongly suspected <sup>d</sup> | <b>0.00</b> [-0.88 , 0.88]  | ⊕⊕○○<br>Low      |

a. Due to substantial differences in interventions and comparisons.

b. Due to high unexplained heterogeneity.

c. The 95% CI included benefits and harms.

d. Only reported by 1 study.
