# Supplementary figures and images for: Nutritional and Exercise-Focused Lifestyle Interventions and Glycemic Control in Women with Diabetes in Pregnancy: A Systematic Review and Meta-Analysis of Randomized Clinical Trials
Source: MDPI journal article supplement (doi:10.3390/nu15020323), 2023-01-09

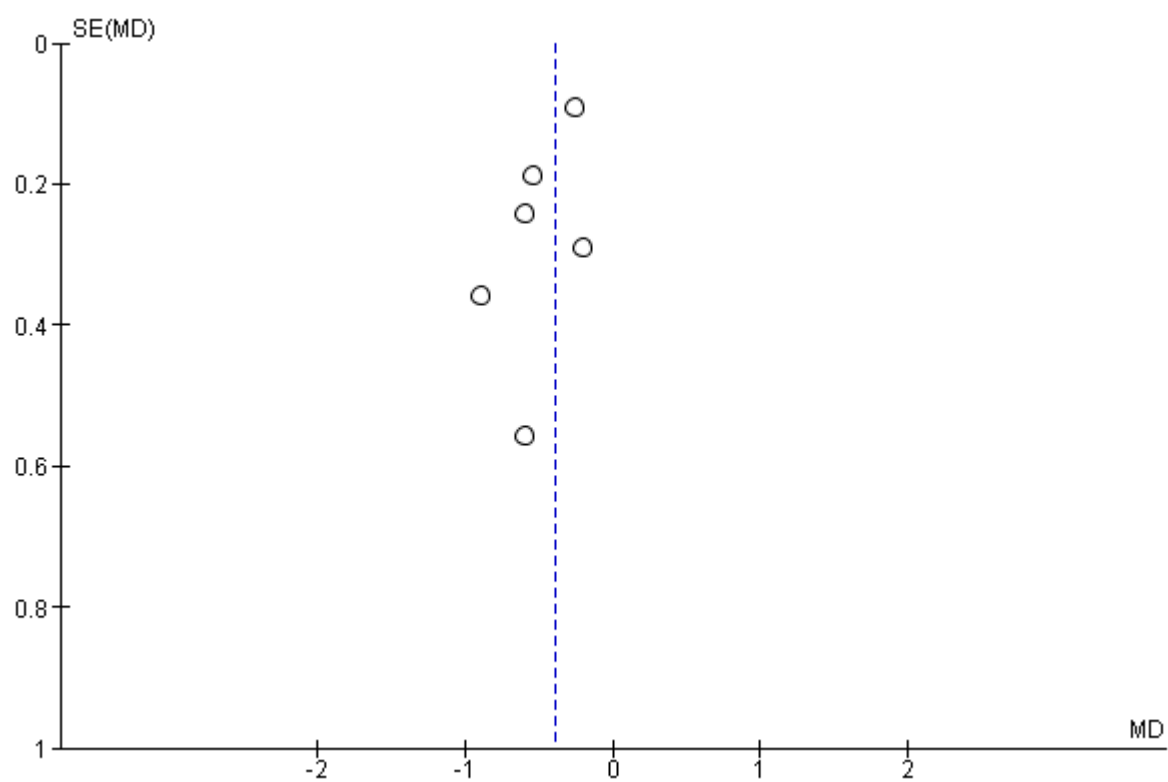

**Figure S2.** Funnel plot of HOMA-IR in nutritional supplement interventions

Supplement: s1 [file s1]

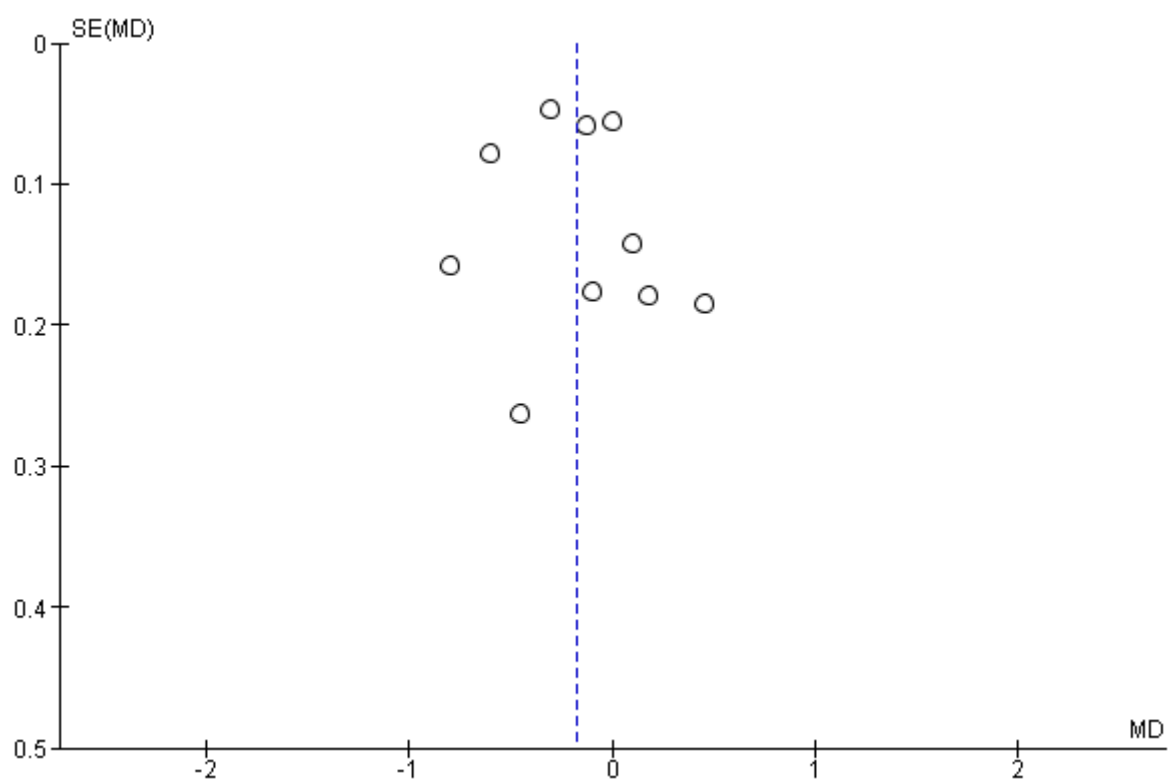

**Figure S3.** Funnel plot of fasting plasma glucose (mmol/L) in dietary interventions

Supplement: s1 [file s1]

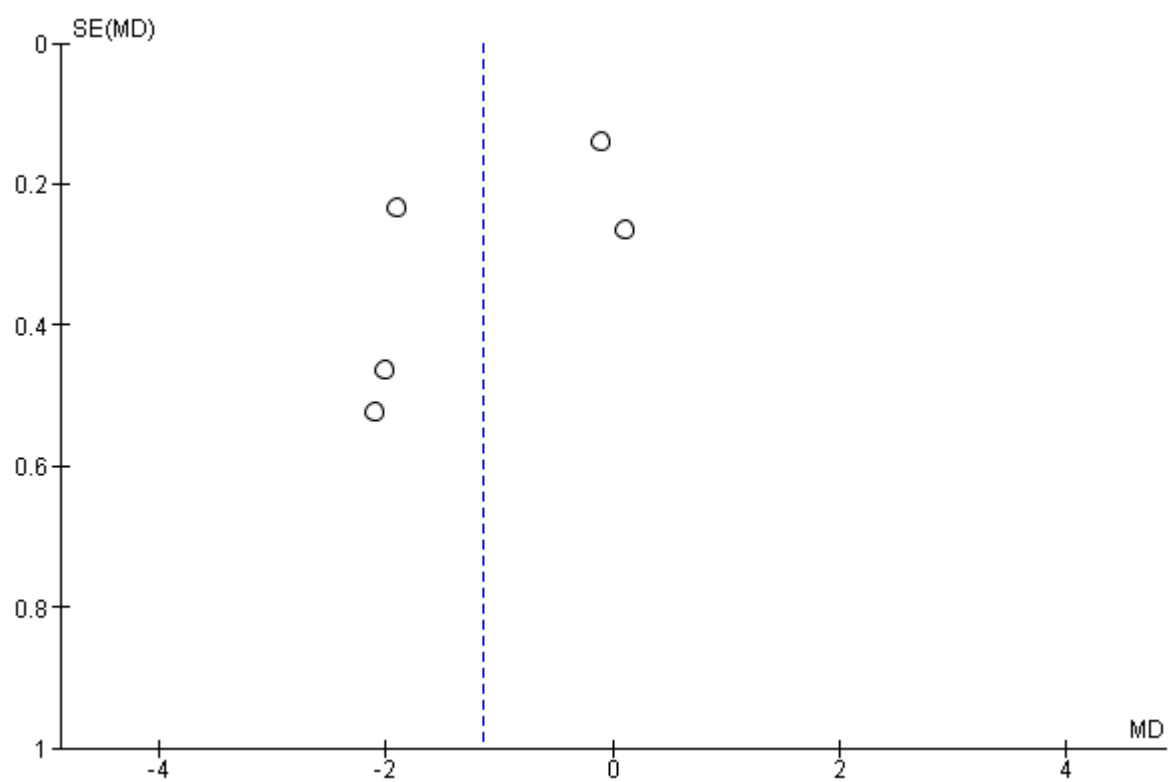

**Figure S4.** Funnel plot of HOMA-IR in dietary interventions

Supplement: s1 [file s1]

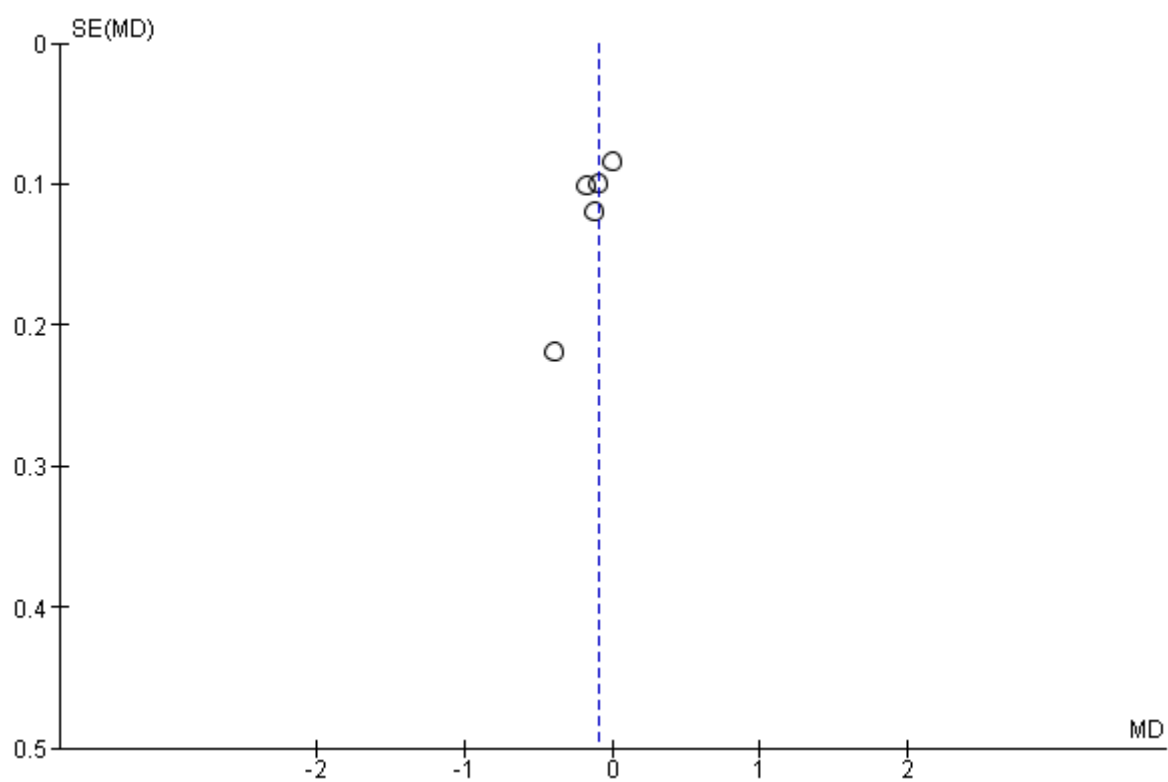

**Figure S5.** Funnel plot of fasting plasma glucose (mmol/L) in exercise interventions

Supplement: s1 [file s1]
